# Supplementary material for: Age-Associated Loss in Renal Nestin-Positive Progenitor Cells
Source: MDPI journal article supplement (doi:10.3390/ijms231911015), 2022-09-20
Supplement: s1 [file s1]

# Age-associated loss in renal nestin-positive progenitor cells

Marina I. Buyan, Nadezda V. Andrianova, Vasily A. Popkov, Ljubava D. Zorova, Irina B. Pevzner, Denis N. Silachev, Dmitry B. Zorov and Egor Y. Plotnikov

## Supplementary Figures

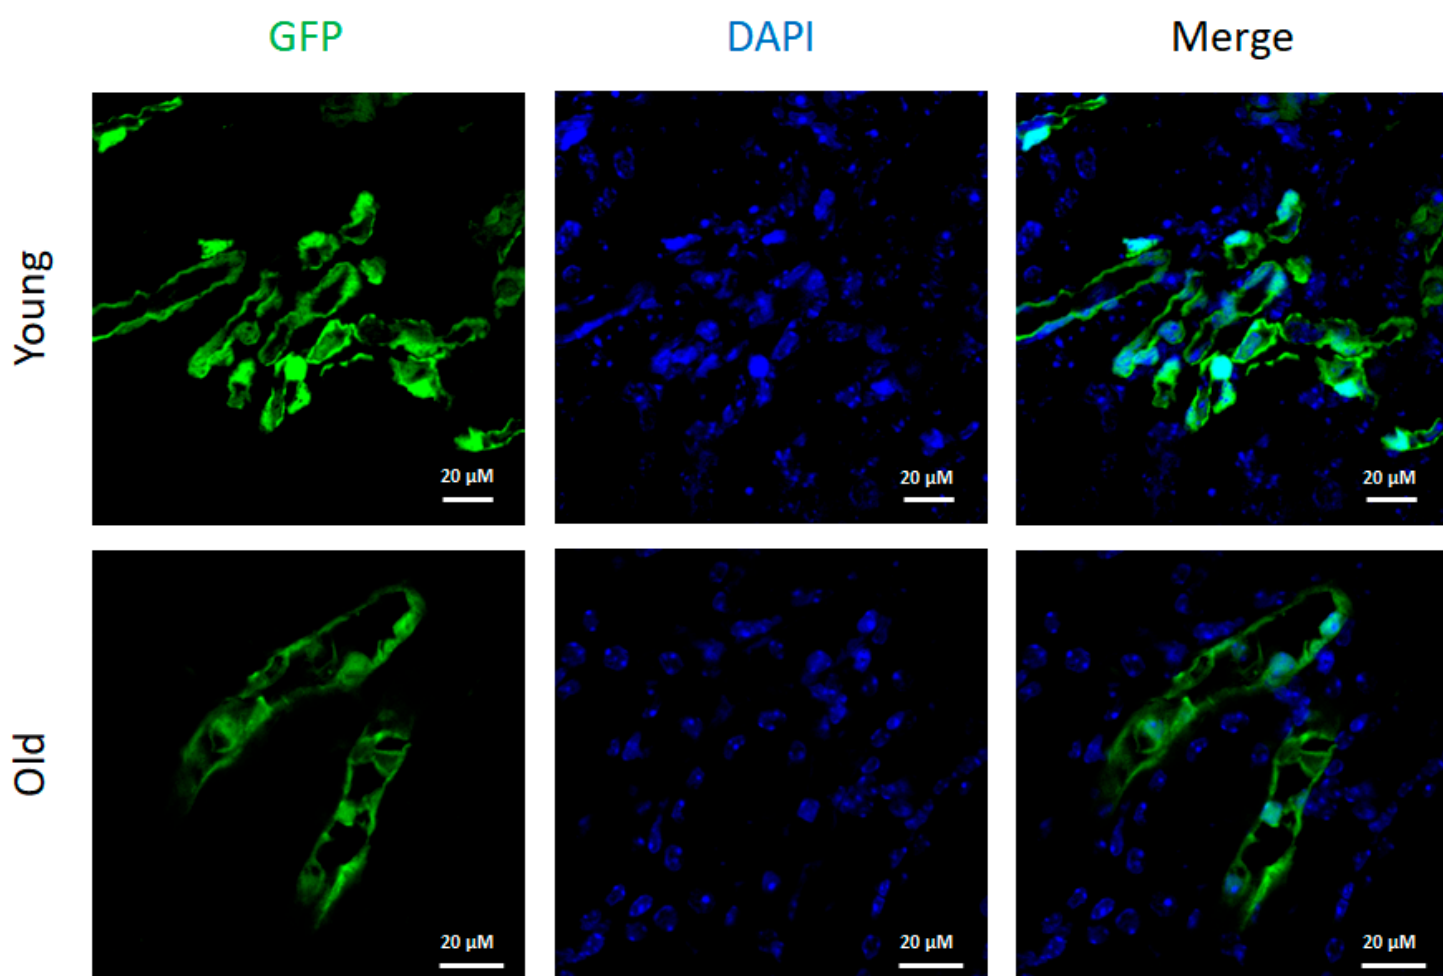

**Supplementary Figure S1.** DAPI (blue) staining of nuclei in kidney slices from young and old nestin-GFP mice.

**A**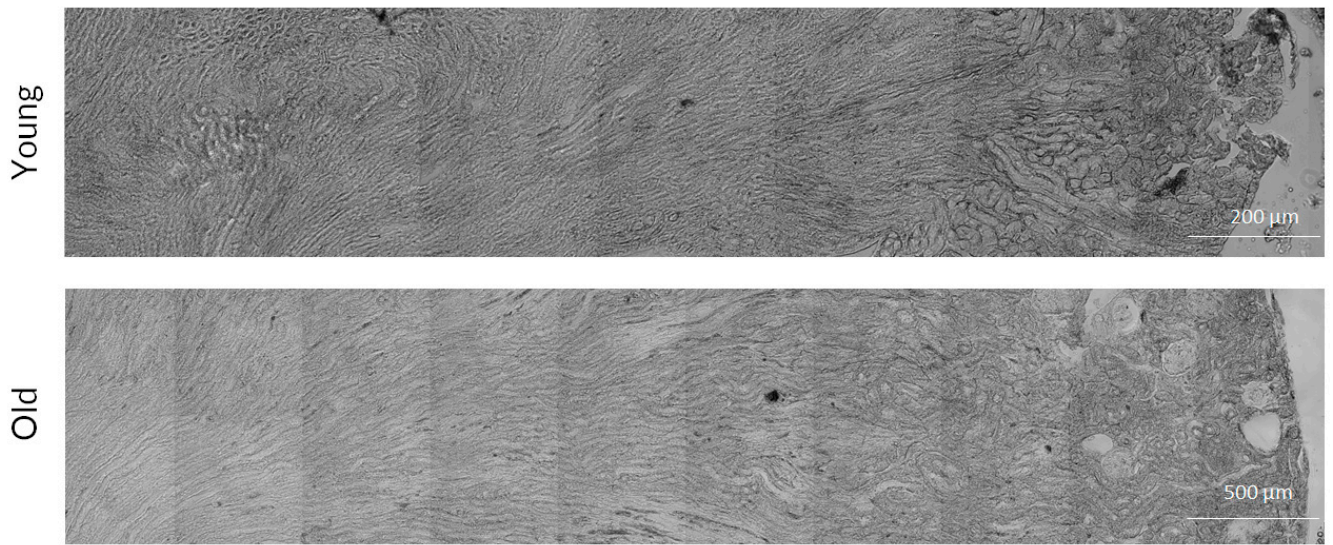**B**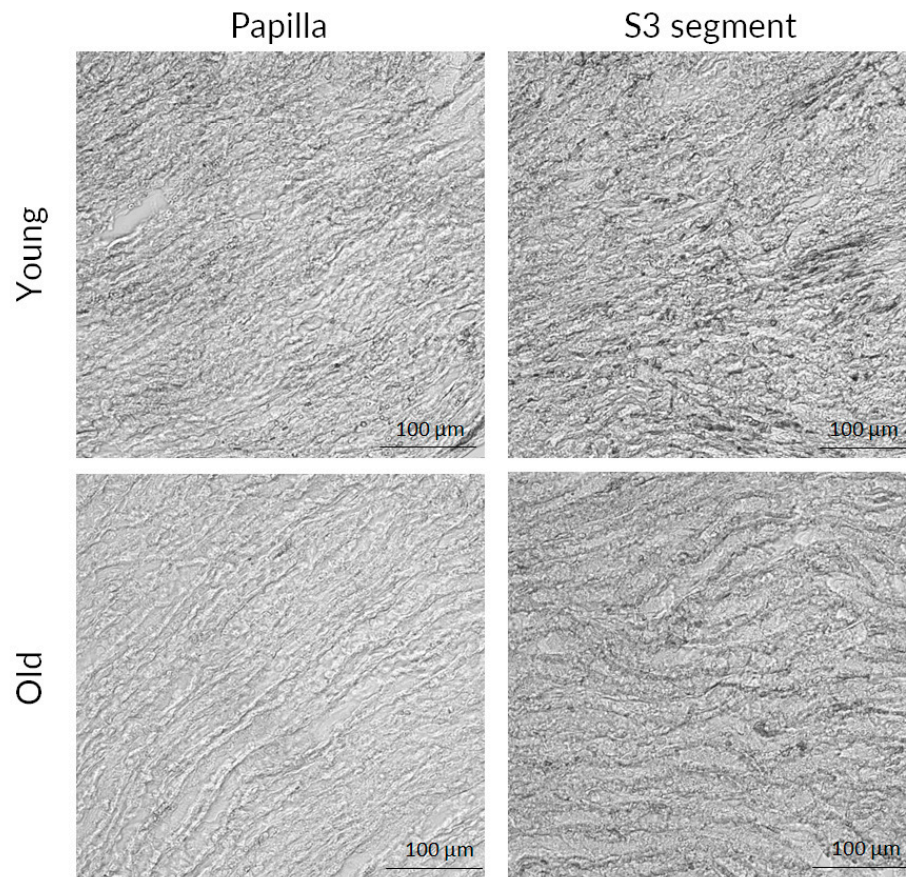

**Supplementary Figure S2.** Transmitted light images of kidney slices from young and old nestin-GFP mice. **(A)** Representative panoramic images of kidney slices; **(B)** Representative images of S3 segment and papilla.

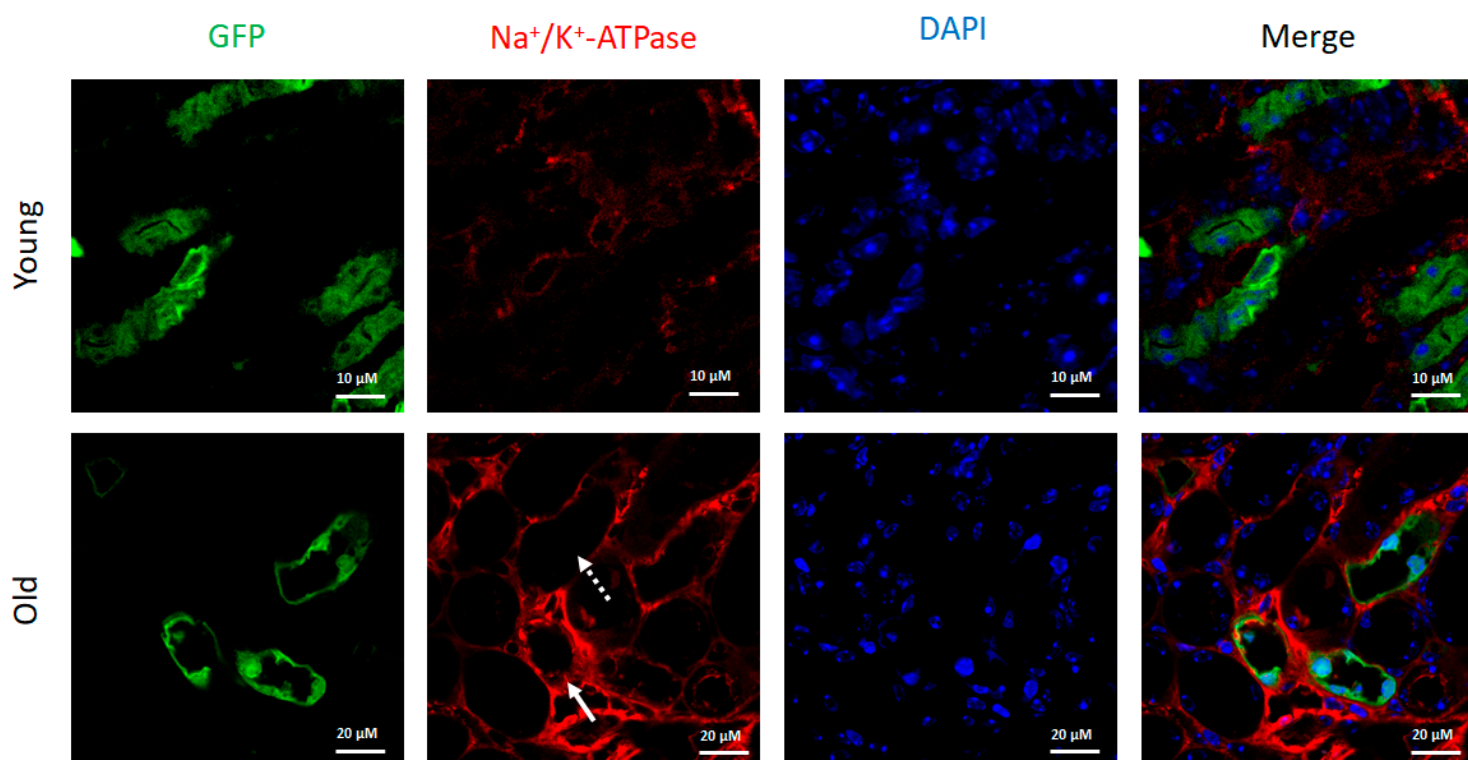

**Supplementary Figure S3.** Immunofluorescent staining with antibodies against Na<sup>+</sup>/K<sup>+</sup>-ATPase of kidney slices from young and old nestin-GFP mice (solid white arrow indicates Na<sup>+</sup>/K<sup>+</sup>-ATPase expression in nestin<sup>+</sup> cells; dotted white arrow shows Na<sup>+</sup>/K<sup>+</sup>-ATPase expression in nestin<sup>-</sup> cells).



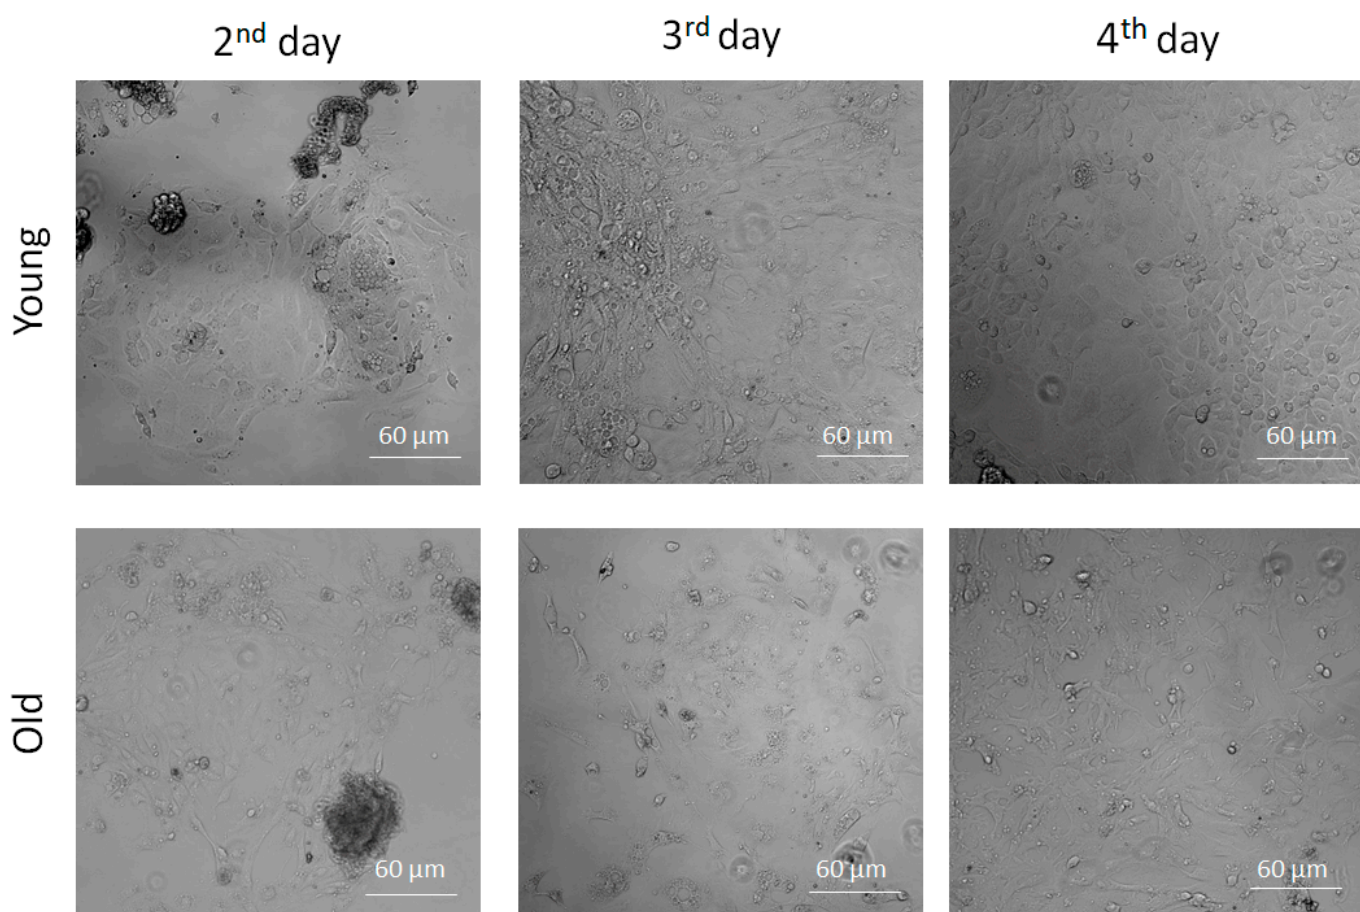

**Supplementary Figure S4.** Transmitted light images of RTCs from young and old nestin-GFP mice during their growth.

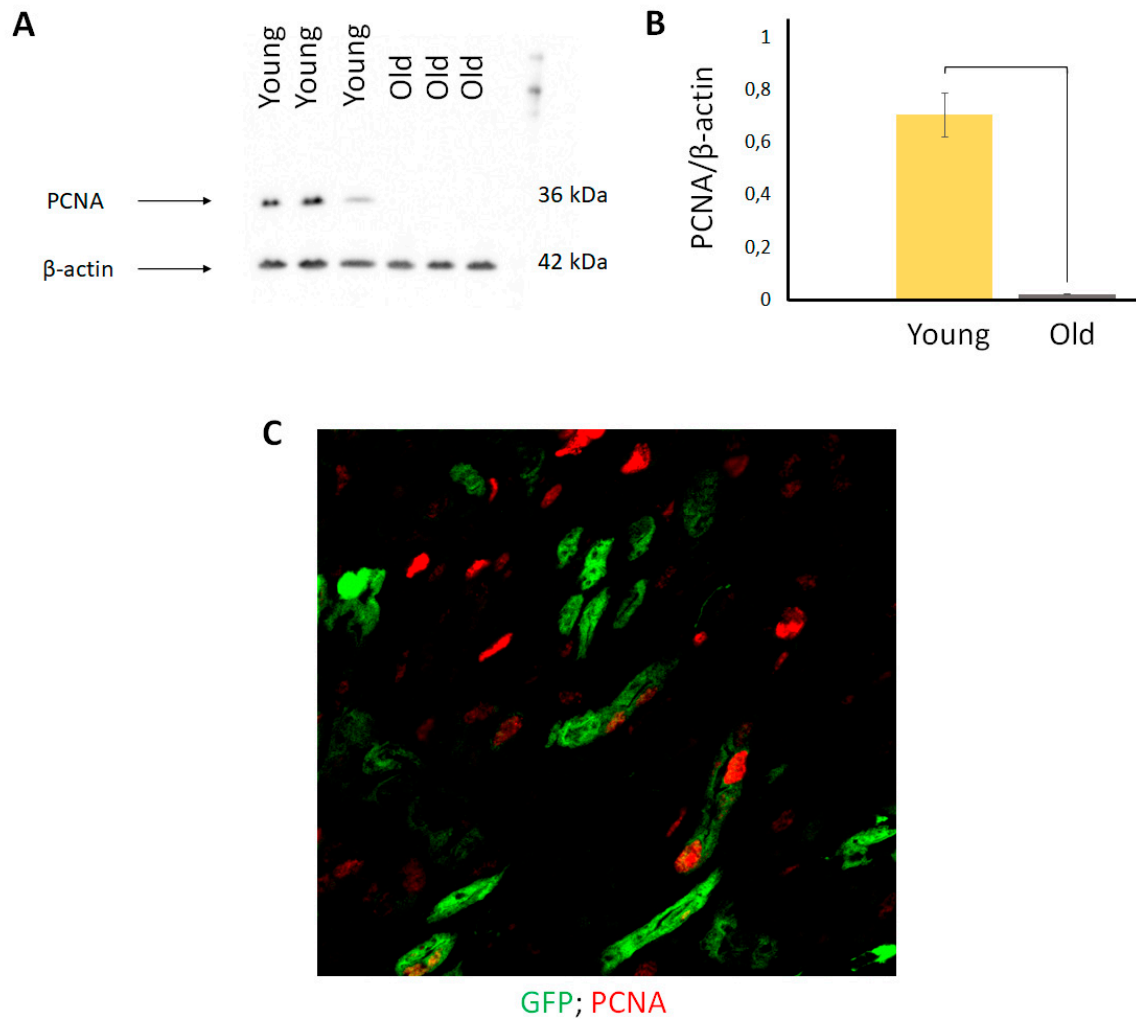

**Supplementary Figure S5.** Evaluation of PCNA-positive cells in the kidneys from young and old transgenic mice. **(A, B)** PCNA levels in kidney homogenates of young and old transgenic mice (mean  $\pm$  SD; P-value < 0.05 (U-test)); **(C)** Representative confocal image of kidney slices from young nestin-GFP mice stained with antibodies against PCNA.

**Supplementary Table S1.** Live and dead cell concentration and viability of RTCs from young and old mice with 6.2  $\mu$ M cisplatin treatment for 24 h.

| Age               | Live cell concentration<br>(cells/mL) | Dead cell concentration<br>(cells/mL) | Viability, % |
|-------------------|---------------------------------------|---------------------------------------|--------------|
| Young (control)   | $5.92 \times 10^5$                    | $1.30 \times 10^5$                    | 82.1         |
| Young (cisplatin) | $4.91 \times 10^5$                    | $2.50 \times 10^5$                    | 66.2         |
| Old (control)     | $2.92 \times 10^5$                    | $2.68 \times 10^5$                    | 52.1         |
| Old (cisplatin)   | $2.73 \times 10^5$                    | $4.21 \times 10^5$                    | 39.3         |

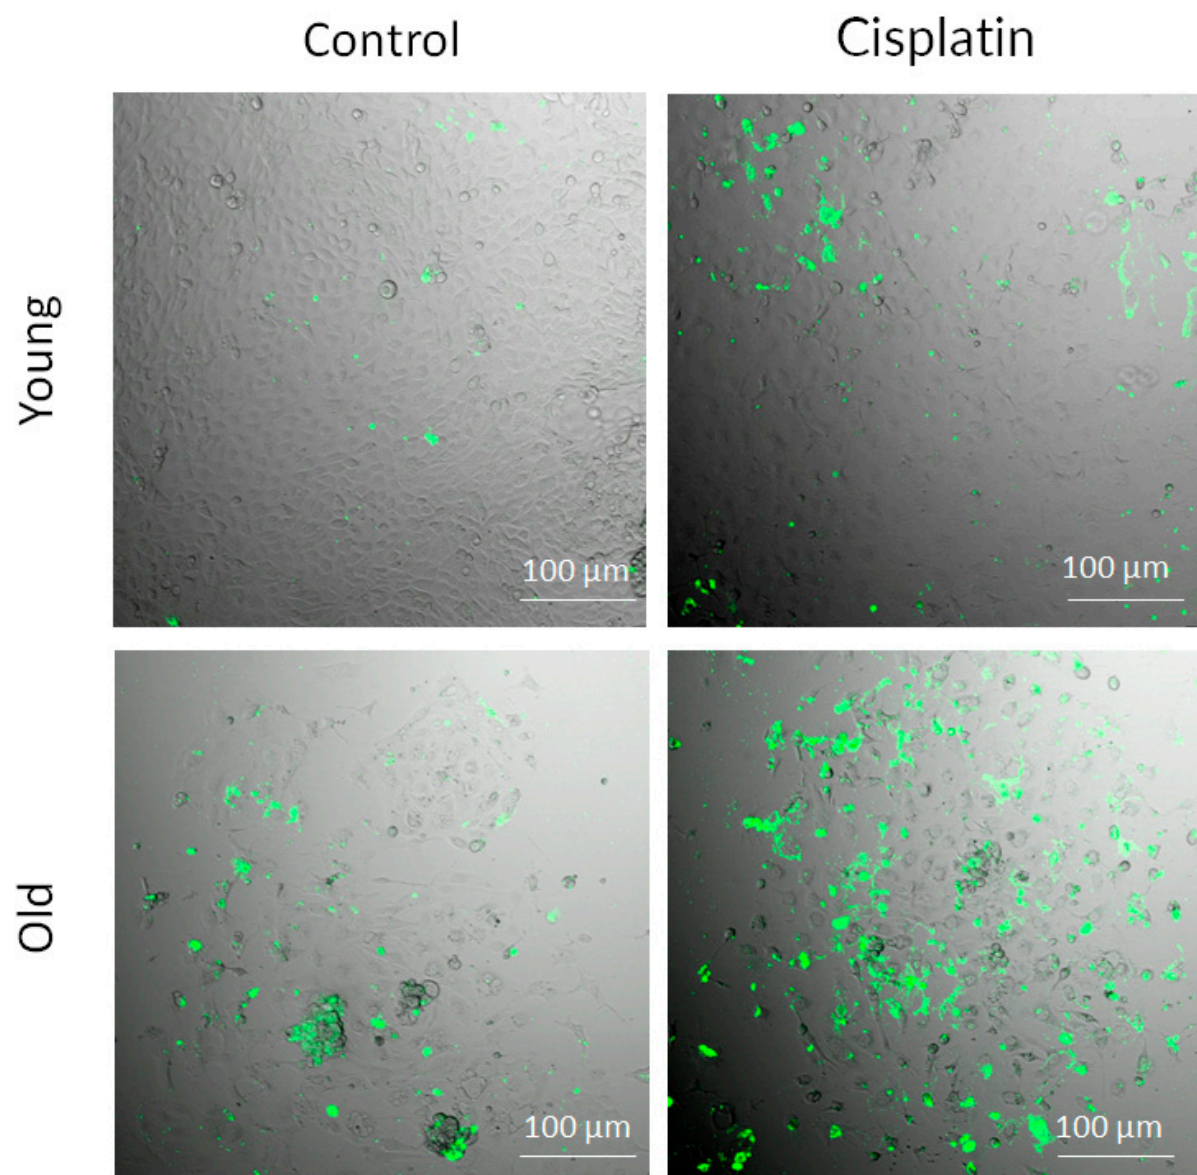

**Supplementary Figure S6.** Representative confocal images of Annexin V-FITC staining of RTCs cultures from young and old mice after 6.2  $\mu$ M cisplatin treatment for 24 h.

**A**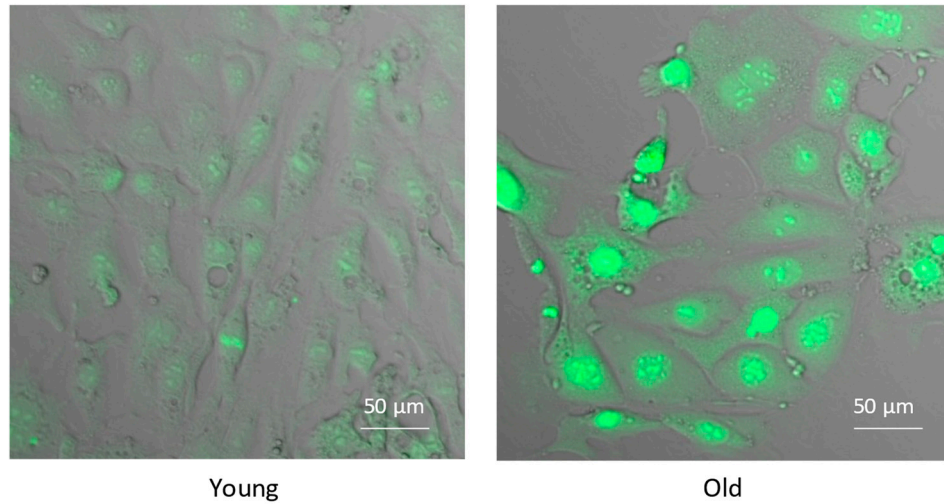**B**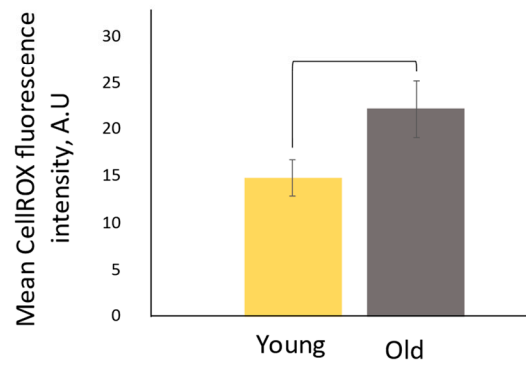

**Supplementary Figure S7.** Oxidative stress in RTCs cultures from young and old mice. **(A)** Representative confocal images of cells loaded with CellROX; **(B)** Mean fluorescence intensity of cells after CellROX staining (mean  $\pm$  SD; P-value < 0.05 (U-test)).
